# Supplementary material
Source: PubMed Central journal article supplement (PMC3251229)

## **Table S1. Primer sequences**

### **Figure S1. *VTRNA2-1* methylation and expression in hematopoietic cell lines**

Most of the lymphoid cell lines (Granta, JEKO, RL, REC, JVM) carry a *VTRNA2-1* methylation level close to the normal cells, while the myeloid cell lines (NB4, F36P, HL60, KG1, KG1a, and U937) are either fully methylated or unmethylated (<10% methylation by pyrosequencing). Expression of vtRNA2-1 was only detected in the cell lines with a hypomethylated or intermediate methylated promoter.

### **Figure S2. miR886-3p or 5p/svRNAs are not detected in HL60 cells after treatment with demethylating drugs**

Northern blot showing that treatment with demethylating drugs upregulate the vtRNA2-1, the mature miRs/svRNAa are not detected.

### **Figure S3. The level of vtRNA2-1 expression corresponds to the level of methylation in PBL MNC of healthy individuals**

Individuals with hypomethylated *VTRNA 2-1* show significant higher expression of vtRNA2-1 than individuals with intermediate methylation levels.

### **Figure S4. Correlation between methylation and expression in 4 lenalidomide treated MDS/AML patients**

Expression in CD34<sup>+</sup> cells from 4 lenalidomide treated patients. vtRNA2-1 is induced by lenalidomide in the 2 patients (case 23 and 28) with an intermediate methylated or hypomethylated promoter. By contrast, expression is not detected and not inducible by lenalidomide from the cases with a hypermethylated promoter. Reactions were done in technical duplicates. Methylation levels were determined in BM MNC by pyrosequencing.

### **Figure S5. Over-all survival of AML patients corresponds to *VTRNA2-1* methylation status**

Patients are divided into 2 groups depending on *VTRNA2-1* methylation status (<10% methylation, >10% methylation). Patients with <10% methylation of *VTRNA2-1* have a significant better survival.

### **Figure S5. No significant difference in the level of *LINE1* methylation in AML patients with or without methylation of *VTRNA2-1* promoter**

BM MNC from 16 AML cases with methylation of the *VTRNA2-1* promoter (>10 % by pyrosequencing) and 16 AML cases without *VTRNA2-1* methylation (<10%) were examined for *LINE1* methylation by pyrosequencing. There was no significant difference between the two groups (t-test, P=0.662).

**Table S1**

| Sequence             | Assay                           |                                                                                                   | Primer/probe sequence (5'-3')                                                                              | Annealing/<br>number of cycles |
|----------------------|---------------------------------|---------------------------------------------------------------------------------------------------|------------------------------------------------------------------------------------------------------------|--------------------------------|
| vtRNA2-1             | Expression                      | F<br>R<br>P                                                                                       | 5'-CGGAGTTAGCTCAAGCGGTTA-3'<br>5'-TCTCGAACCCAGCACAGA-3'<br>5'-6FAM-CTCCTCATGCCGGACTTTCTATCTGTCCAT-TAMRA-3' | 60°C /40                       |
|                      | Ms-MCA                          | F1                                                                                                | 5'-GTTTTTTTAGGATAGGTTAGT-3'                                                                                | 56°C /45                       |
|                      |                                 | R1                                                                                                | 5'-AAAAAACCAACTACATATACTCCC-3'                                                                             | 60°C /45                       |
|                      |                                 | F2                                                                                                | 5'-TTTTTTTATGGTTTGAAGTTTATAGT-3'                                                                           |                                |
| R2                   | 5'-TTACATAAAAAAATCAATAAACACC-3' |                                                                                                   |                                                                                                            |                                |
| Pyrosequencing       | F                               | 5'-TTATTTTTTTATGGTTTAGAAGTTTT-3'                                                                  | 56°C /45                                                                                                   |                                |
|                      | R<br>S                          | 5'-BioTin-TTACATAAAAAAATCAATAAACACC-3'<br>5'-TTTTTTTATGGTTTGAAGTTTATAGT-3'                        |                                                                                                            |                                |
| DGGE                 | F<br>R                          | 5'-[40CG][5AT]AGTTTCAGTCGCACACTCCT-3'<br>5'-CAGATTATACCGAATTTATTGCATA-3'                          | 56°C /38                                                                                                   |                                |
| Bisulfite sequencing | F<br>R                          | 5'-GGAAGGGGGTAAAATTTATTTATTG-3<br>5'-ACCACAAAACCCCTACCTTTAAC-3                                    | 58°C /45                                                                                                   |                                |
| RACE                 | 5'-outer<br>5'-inner<br>3-outer | 5'-TTATTGCATAAAAGGGTCAGTAAGCACC -3'<br>5'-TCGAACCCAGCACAGAGATG -3'<br>5'-GTCGGAGTTAGCTCAAGCGGT-3' |                                                                                                            |                                |
| Northern             | P                               | 5'-AAG GGT CAG TAA GCA CCC GCG -3'                                                                |                                                                                                            |                                |
| miR886-3p            | Expression                      |                                                                                                   | TaqMan® MicroRNA Assays, ID 002194                                                                         | 60°C /40                       |
| miR886-5p            | Expression                      |                                                                                                   | TaqMan MicroRNA Assays, ID 002195                                                                          | 60°C /40                       |
| miR377               | Northern                        | P                                                                                                 | 5'-ACA AAA GTT GCC TTT GTG TGA T-3'                                                                        |                                |
| RNU6B                | Expression                      |                                                                                                   | TaqMan MicroRNA Assays, ID 001093                                                                          | 60°C /40                       |
| RNU6B                | Northern                        | P                                                                                                 | 5'-GCA GGG GCC ATG CTA ATC TTC TCT GTA TCG-3'                                                              |                                |
| GAPDH                | Expression                      |                                                                                                   | TaqMan Gene Expression Assays, ID Hs02758991_g1                                                            | 60°C /40                       |
| LINE-1               | Pyrosequencing                  |                                                                                                   | Qiagen PyroMark Q24 CpG LINE-1, cat. no. 970012                                                            | 50°C /45                       |
| CTNNA1               | Ms-MCA                          | F                                                                                                 | 5'-GATTGGAGGGAGATAAAGTAG-3'                                                                                | 62°C /45                       |
|                      |                                 | R                                                                                                 | 5'-CCcACCCAAAAACCTCT-3'                                                                                    |                                |

**Figure S1**

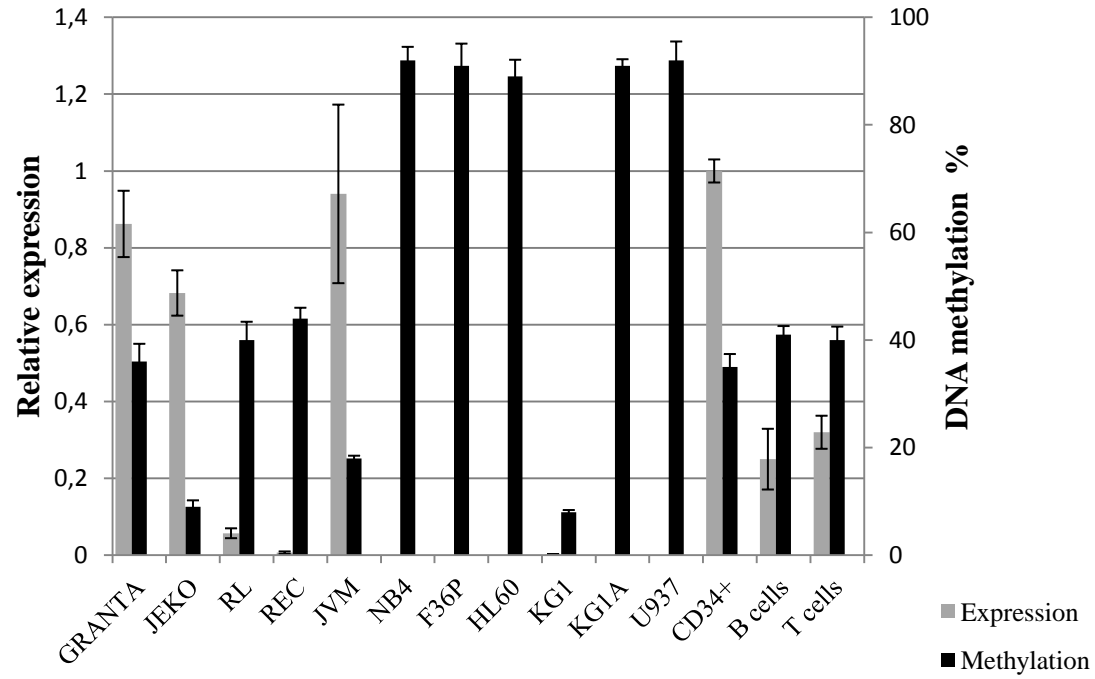

**Figure S2**

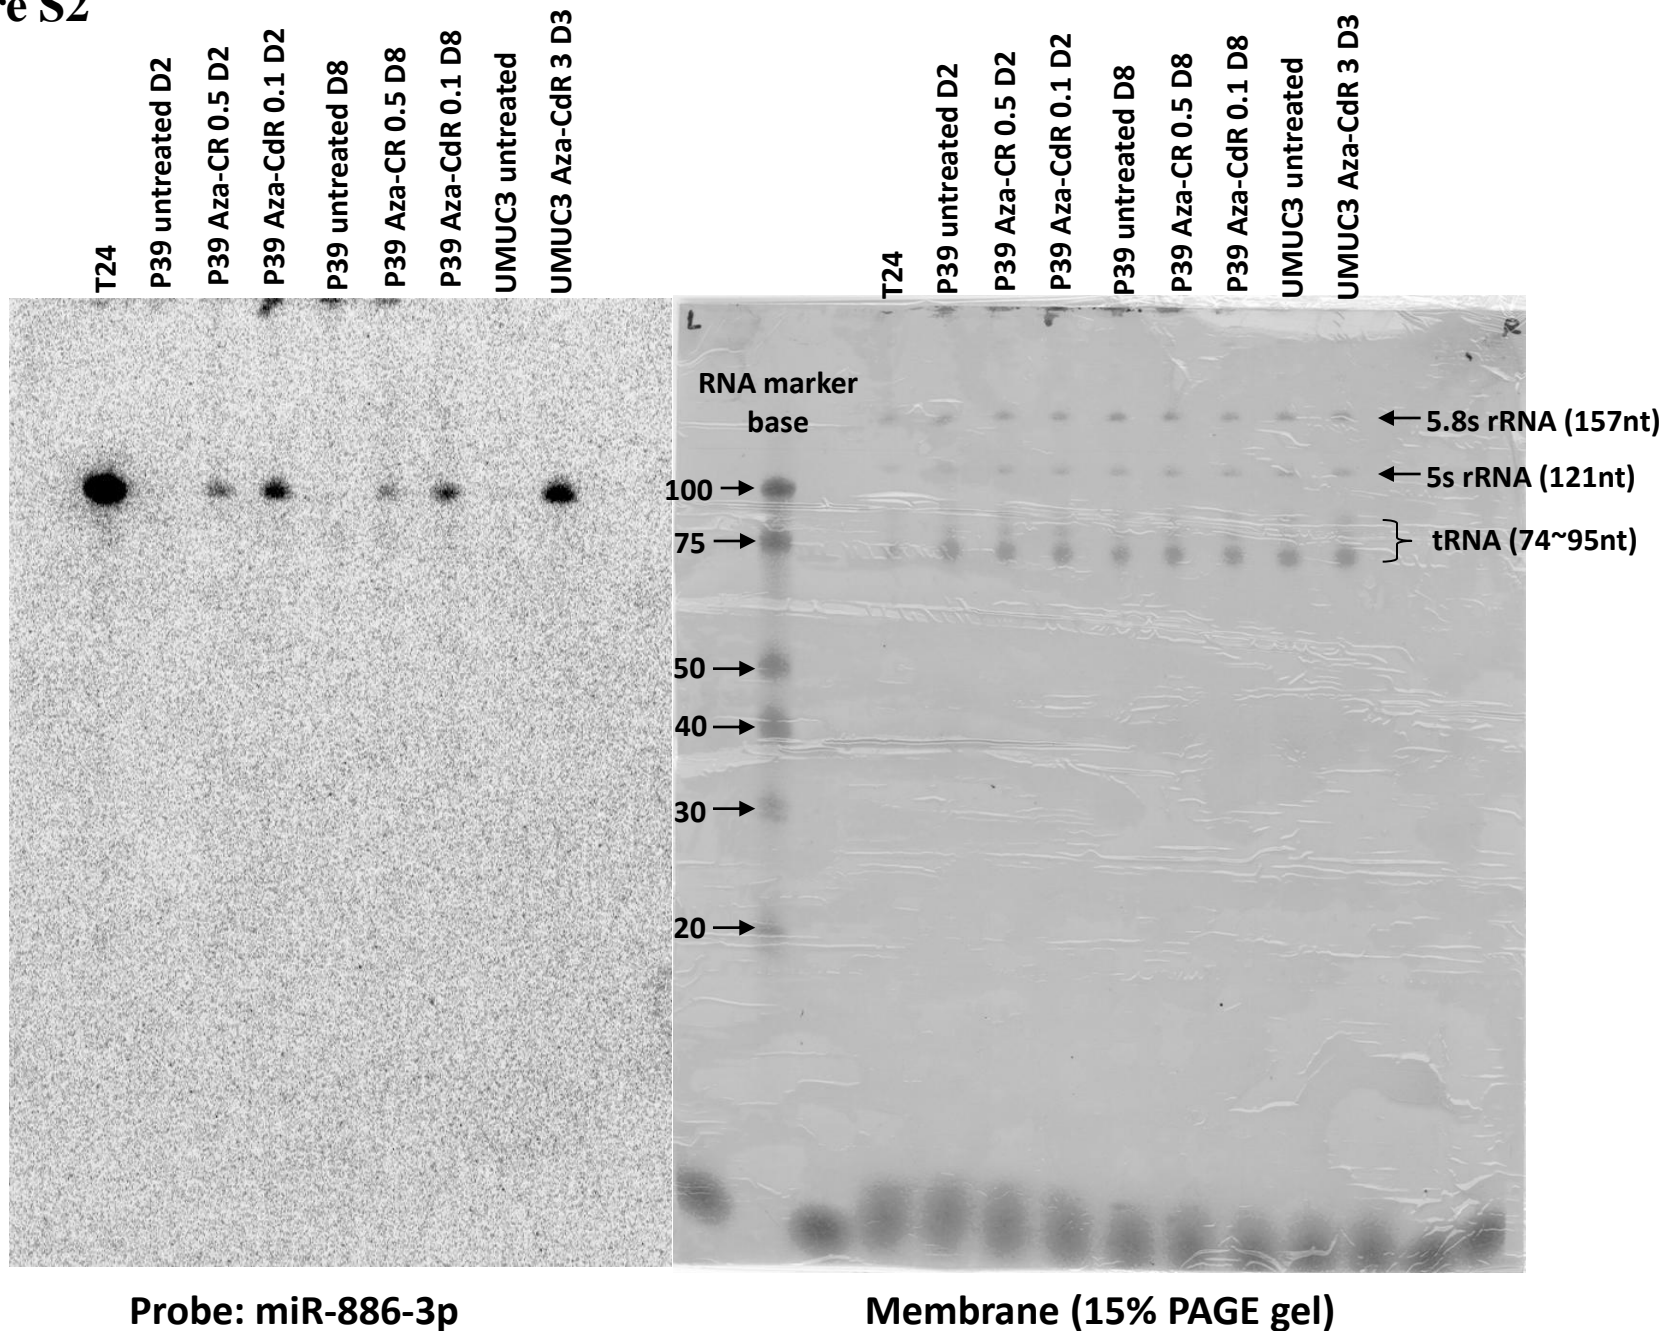

**Figure S3**

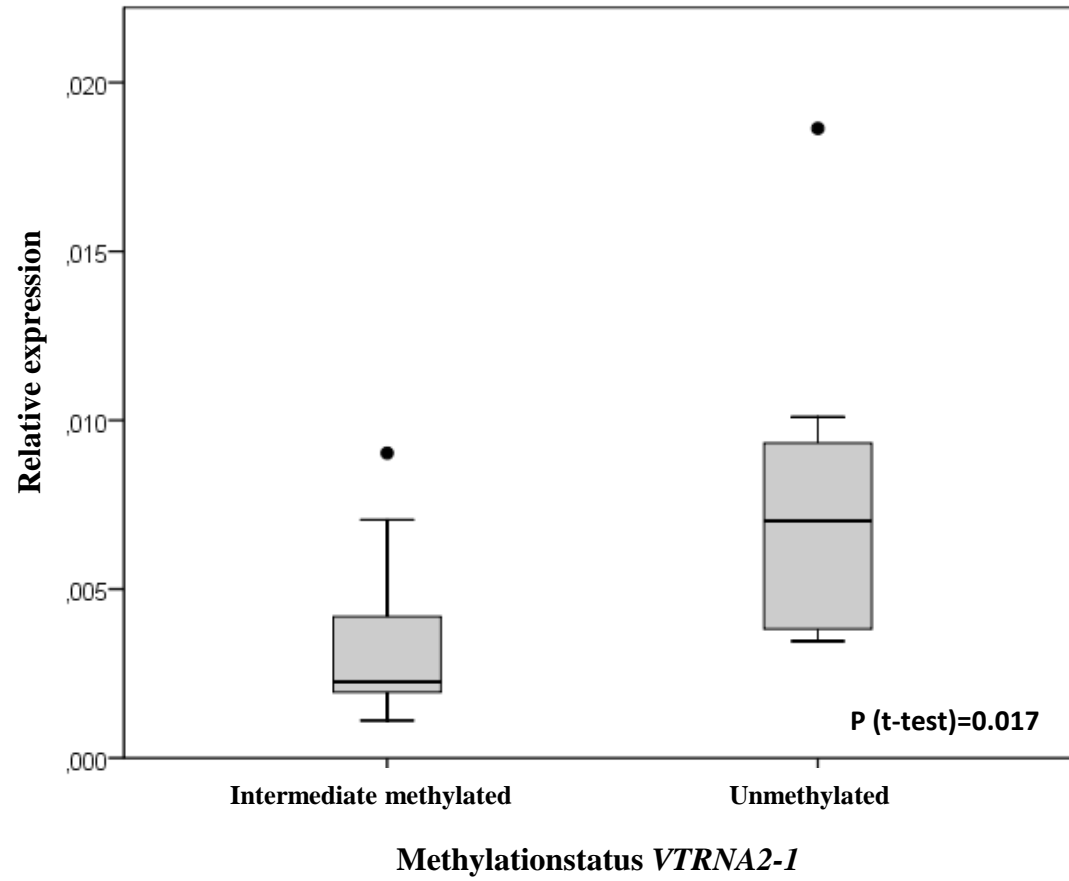

**Figure S4**

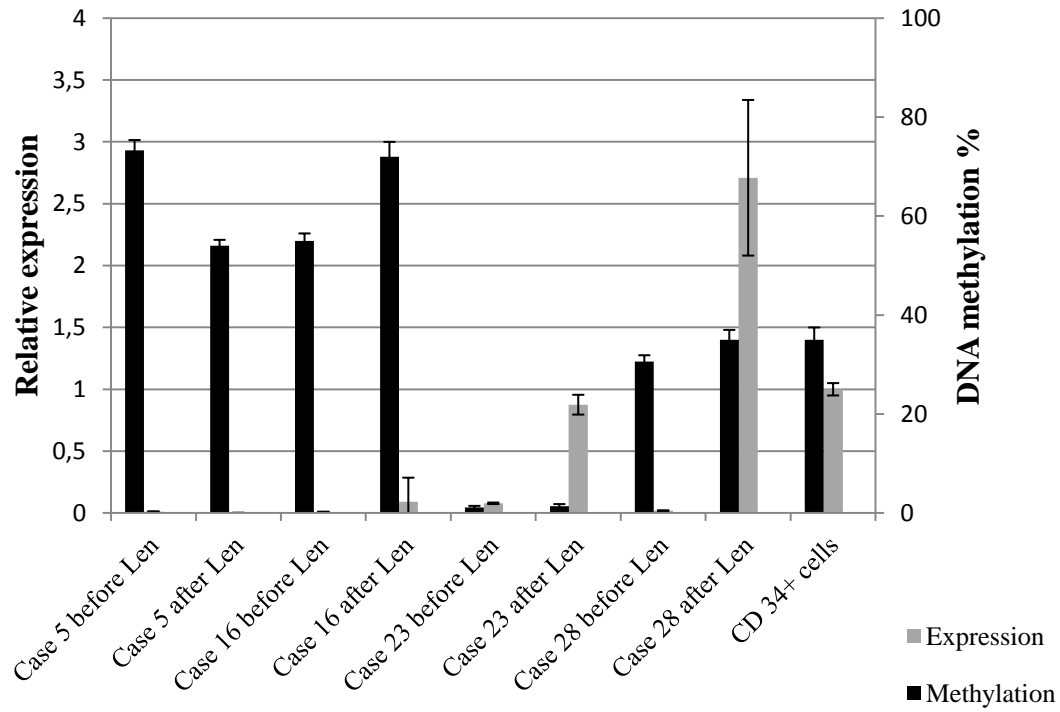

**Figure S5**

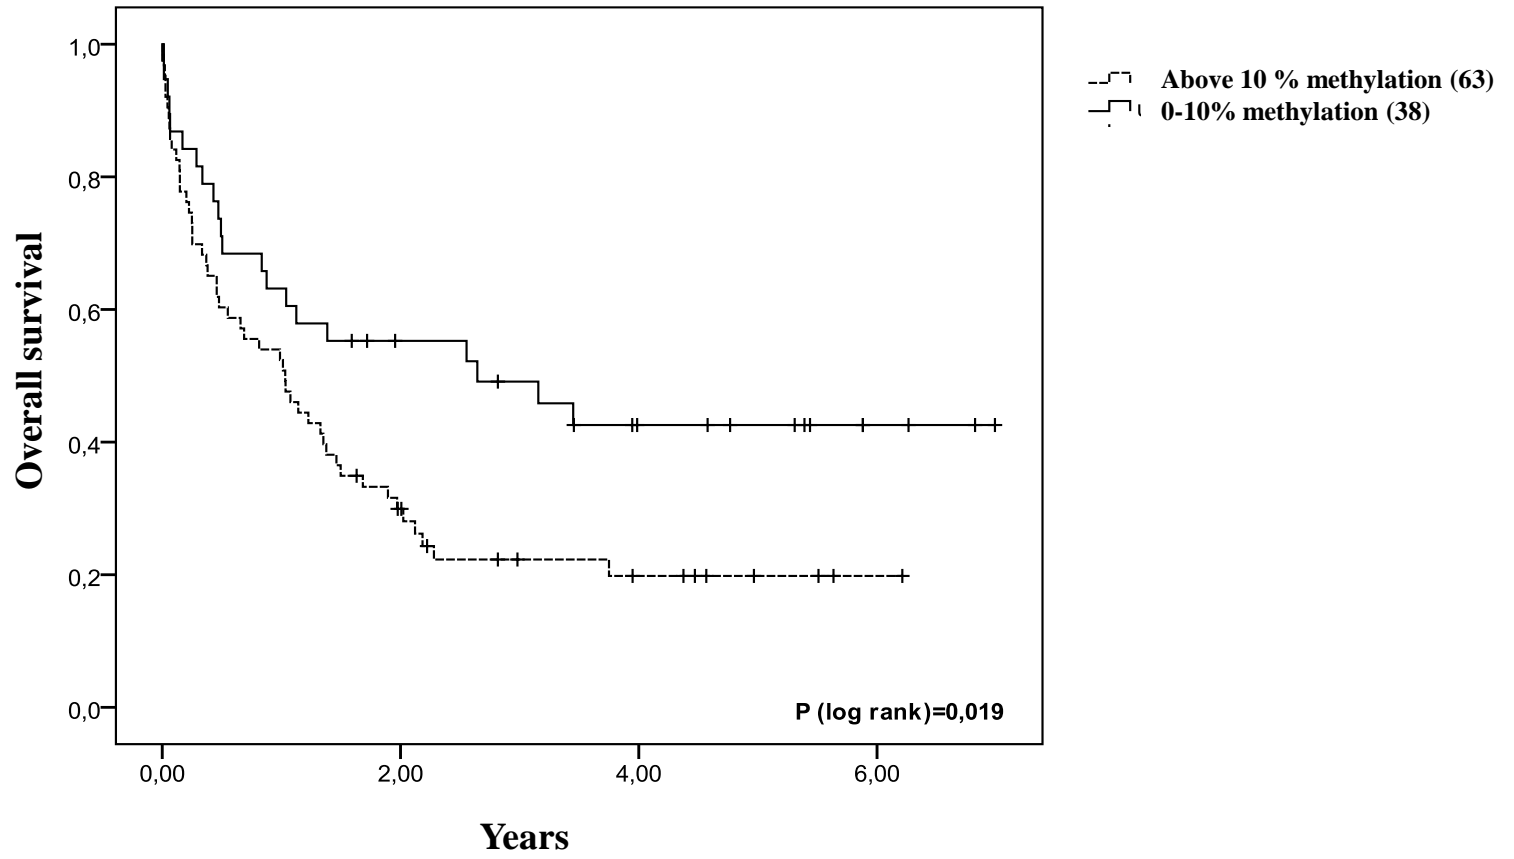

**Figure S6**

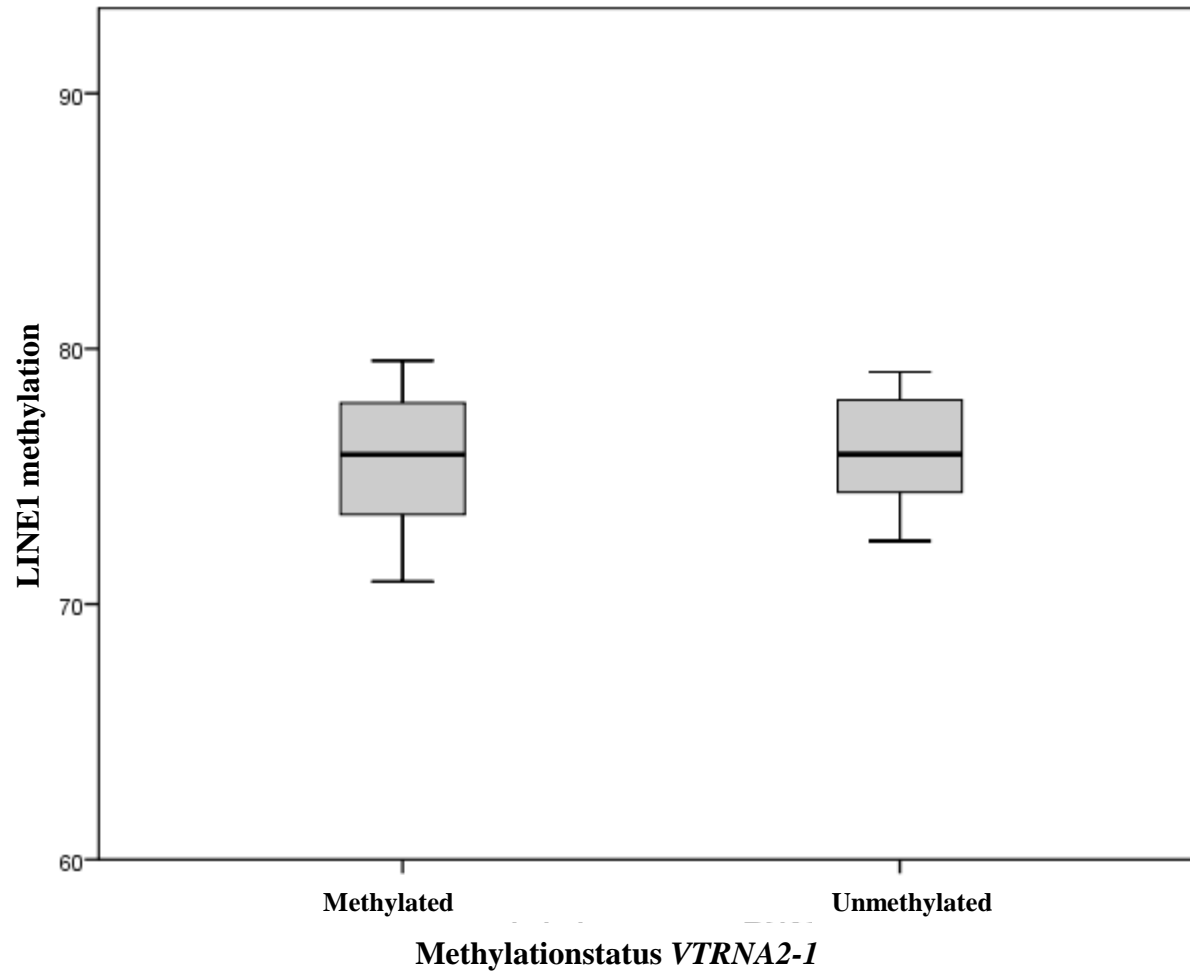

Supplement: supp_blood-2011-06-362541_Document1.pdf [file supp_blood-2011-06-362541_Document1.pdf]
